# Supplementary material for: Ring-opening polymerization reaction of polyhedral oligomeric silsesquioxanes (POSSs) for preparation of well-controlled 3D skeletal hybrid monoliths
Source: Royal Society of Chemistry journal article supplement (doi:10.1039/c2cc36881a), 2012-10-09
Supplement: c2cc36881a.pdf [file c2cc36881a.pdf]

1           **Ring-Opening Polymerization Reaction of Polyhedral**  
2           **Oligomeric Silsesquioxanes (POSSs) for Preparation of**  
3           **Well-controlled 3D Skeletal Hybrid Monoliths**

4  
5                                           **Supporting Information**

6                                           **Hui Lin<sup>a,b</sup>, Junjie Ou<sup>a,\*</sup>, Zhenbin Zhang<sup>a,b</sup>, Jing Dong<sup>a</sup>, Hanfa Zou<sup>a,\*</sup>**

7  
8           <sup>a</sup> CAS Key Laboratory of Separation Science for Analytical Chemistry, National Chromatographic R &  
9           A Center, Dalian Institute of Chemical Physics, Chinese Academy of Sciences (CAS), Dalian 116023,  
10          China

11          <sup>b</sup> Graduate School of Chinese Academy of Sciences, Beijing 100049, China

12          \* To whom correspondence should be addressed:

13          Prof. Hanfa Zou

14          Tel: +86-411-84379610

15          Fax: +86-411-84379620

16          E-mail: hanfazou@dicp.ac.cn

17          Dr. Junjie Ou

18          Tel: +86-411-84379576

19          Fax: +86-411-84379620

20          E-mail: junjieou@dicp.ac.cn

21

22

23

24

## 25 **Experimental section**

26

### 27 **Materials**

28

29 Octaglycidyl dimethylsilyl POSS (PSS-octa[(3-glycidyloxypropyl)dimethylsiloxy] substituted)  
30 (POSS-epoxy), hexamethylene diamine (HDA), 1,8-diaminooctane (DAO), 1,10-diaminodecane  
31 (DAD), 1,12-diaminododecane (DADD), poly(ethylene glycol) (PEG, Mn=10,000) and  
32 (3-aminopropyl)triethoxysilane (APTES) were purchased from Aldrich (Milwaukee, WI, USA).  
33 The fused-silica capillaries with dimension of 50 and 75  $\mu\text{m}$  i.d. and 365  $\mu\text{m}$  o.d. were obtained  
34 from the Refine Chromatography Ltd. (Yongnian, Hebei, China). Trypsin was purchased from  
35 Promega (Madison, WI, USA). Bovine serum albumin (BSA), thiourea, benzene, toluene, phenol  
36 and other standard compounds were all obtained from Sigma (St Louis, MO, USA). Dithiothreitol  
37 (DTT) and iodoacetamide (IAA) were purchased from Sino-American Biotechnology Corporation  
38 (Beijing, China). HPLC-grade acetonitrile (ACN) was used for the preparation of mobile phases.  
39 The water used in all experiments was doubly distilled and purified by a Milli-Q system  
40 (Millipore Inc., Milford, MA, USA). C18-particles (5  $\mu\text{m}$ , 120  $\text{\AA}$  pore) were purchased from  
41 DAISO (Osaka, Japan). Other chemical reagents were all of analytical grade.

42

### 43 **Preparation and modification of the POSS-based hybrid monoliths**

44

45 Before the preparation of the monolithic columns, the fused-silica capillary was pretreated and  
46 rinsed by 1.0 M NaOH for 4 h, water for 30 min, 1.0 M HCl for 14 h, and water for another 30  
47 min, successively, and then dried by a nitrogen stream at room temperature. The mixture of  
48 (3-aminopropyl)triethoxysilane (APTES)/methanol (50%, v/v) was used to introduce the  $-\text{NH}_2$   
49 group onto the inner surface of capillary for anchoring monolith matrices to the capillary inner  
50 wall, as described in the previous report,<sup>1</sup> and then the prepolymerization mixture with the feed  
51 recipes listed in Table 1 was injected into the modified capillaries with a syringe. The fulfilled  
52 capillaries were then sealed with rubber stoppers and immersed in a water bath at 50  $^\circ\text{C}$  for 24 h.  
53 After that, the capillaries were flush with methanol. For bulk hybrid monoliths, the

54 prepolymerization mixture was placed in a centrifuge tube and reacted under the same conditions.  
55 After polymerization, the bulk hybrid monoliths were cut into smaller pieces, extracted with  
56 ethanol overnight in a Soxhlet apparatus and dried in a vacuum. For the modification of the  
57 resulting hybrid capillary monolithic column, a H<sub>2</sub>O/ACN (50%, v/v) mixture contain 2.5% (v/v)  
58 ammonia was pumped through the column and reacted at 50 °C overnight, then the columns were  
59 washed with methanol.

60

## 61 **Instrumentation**

62

63 The chromatographic evaluation of hybrid monolithic columns was performed on an LC system  
64 equipped with an Agilent 1100 (Hewlett-Packard) micropump and a UV detector (K-2501, Knauer,  
65 Germany). Data was collected at 214 nm, and processed by a chromatography workstation  
66 (Beijing Cailu Scientific Instrument Ltd., Beijing, China). A 7725i injector with a 20 µL sample  
67 loop was used. A T-union connector served as a splitter with one end connected to the capillary  
68 monolithic column and the other end to a blank capillary (95-cm long, 50 µm i.d. and 365 µm o.d.).  
69 The split ratio was controlled at about 1/240. The outlet of the hybrid monolithic column was  
70 connected with a Teflon tube to a empty fused-silica capillary (75 µm i.d. and 365 µm o.d.), where  
71 a detection window was made by removing a 2 mm length of the polyimide coating in a position  
72 of 5.5 cm from the separation monolithic column outlet.

73 SEM images were obtained by using a JEOL JSM-5600 scanning electron microscope (JEOL,  
74 Tokyo, Japan). FT-IR spectra were measured with a Bruker Tensor 27 FT-IR spectrometer (Bruker  
75 Daltonics, Ettlingen, Germany). Pore size measurement was performed on an Autopore IV 9500  
76 (Micromeritics, Norcross, USA). Thermal gravimetric analysis was carried out on a Setsys 16/18  
77 (Setaram, Caluire, France). Nitrogen adsorption/desorption measurements of dry bulk monoliths  
78 were performed on a Quadrasorb SI surface area analyzer and pore size analyzer (Quantachrome,  
79 Boynton Beach, USA).

80

## 81 **Preparation of BSA Tryptic Digest and cHPLC-MS Analysis.**

82

83 The 2 mg BSA was dissolved in 1 mL of denaturing buffer containing 8 M urea and 100 mM

84 ammonium bicarbonate. After the addition of 20  $\mu$ L of DTT (20 mM) solution, the mixture was  
85 incubated at 60  $^{\circ}$ C for 1 h to reduce the disulfide bonds of the protein. Subsequently, 7.48 mg IAA  
86 was added, and then the mixture was incubated at room temperature in the dark for 40 min. After  
87 that, the mixture was diluted 8-fold with 100 mM ammonium bicarbonate buffer (pH 8.2) and  
88 digested at 37  $^{\circ}$ C for 16 h with trypsin at enzyme-to-substrate ratio of 1:25 (w/w). After digesting,  
89 the pH value of the tryptic digestion solution was adjusted to 2-3 by 10% trifluoroacetic acid  
90 aqueous solution. Solid-phase extraction (SPE) was performed with a homemade C18 cartridge.  
91 The collected peptides were dried under vacuum and dissolved in a 0.1% formic acid aqueous  
92 solution (2 mL), and then stored in a -20  $^{\circ}$ C freezer before cLC-MS/MS analysis.

93 The cLC-MS/MS analysis was carried out on a Finnigan LTQ ion trap mass spectrometer  
94 (Finnigan, San Jose, USA) which interfaced with a surveyor MS pump. Buffer A was water  
95 (containing 0.1% formic acid), and buffer B was 100% ACN (containing 0.1% formic acid).  
96 Tryptic digests were automatically injected onto the column with buffer A for 3 min at the flow  
97 rate of 5  $\mu$ L/min, the trapped peptides were then separated at a flow rate of ca. 200 nL/min on the  
98 POSS monolith (40 cm in length  $\times$  75  $\mu$ m i.d.) or the C18-particles packed column (12 cm in  
99 length  $\times$  75  $\mu$ m i.d.) with an integrated emitter, which was prepared by directly tapering the tip  
100 from the outlet of the capillary. The separation was performed with gradient elution from 5 to 80%  
101 ACN (containing 0.1% formic acid) within 65 min. The LTQ linear ion trap mass spectrometer  
102 was equipped with a nanospray ion source, and the temperature of the ion transfer capillary was  
103 set at 200  $^{\circ}$ C. The spray voltage was set at 1.8 kV, and the normalized collision energy was set at  
104 35.0%. One microscan was set for each MS and MS/MS scan. All MS and MS/MS spectra were  
105 acquired in the data dependent mode. The mass spectrometer was set such that one full MS scan  
106 was followed by six MS/MS scans on the six most intense ions. The dynamic exclusion function  
107 was set as follows: repeat count 2, repeat duration 30 s, and exclusion duration 90 s. System  
108 control and data collection were done by Xcalibur software version 1.4 (Thermo, USA). The scan  
109 range was set from m/z 400 to m/z 1600.

110 The acquired MS/MS spectra were searched on a database using the SEQUEST (version 0.28)  
111 against an IPI\_bovine\_BOVIN\_3.32 (32946 sequences; 16109453 residues). Cysteine residues  
112 were searched as fixed modification of 57.0215 Da, and methionine residues as variable  
113 modification of 15.9949 Da. Peptides were searched using fully tryptic cleavage constraints and

114 up to two internal cleavage sites were allowed for tryptic digestion. The mass tolerances were 2  
115 Da for parent mass and 1 Da for fragment masses.

116

117 **References**

118 1. L. Ren, Z. Liu, Y. Liu, P. Dou and H.-Y. Chen, *Angew. Chem. Int. Ed.* 2009, **48**, 6704-6707.

119 2. J. Choi, J. Harcup, A. F. Yee, Q. Zhu and R. M. Laine, *J. Am. Chem. Soc.* 2001, **123**,  
120 11420-11430.

121

122

123

124

125

126

127

128

129

130

131

132

133

134

135

136

137

138

139

140

141

142

143

144 **Supplementary Figures**

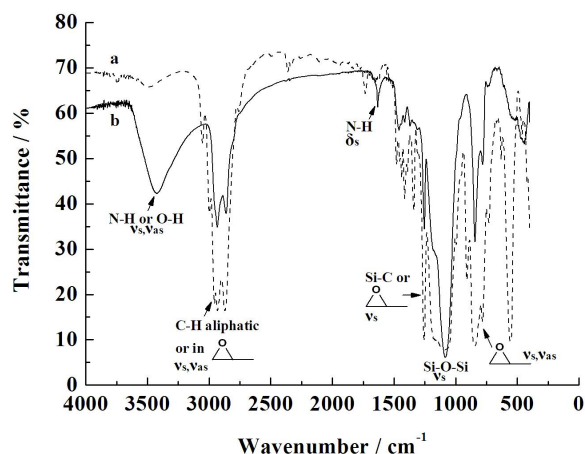

145

146 **Fig. S1** FT-IR spectra of a) octaglycidyl dimethylsilyl POSS (POSS-epoxy), b) POSS-HDA  
147 monolith.  $v_a$ : symmetric vibration,  $v_{as}$ : asymmetric vibration,  $\delta_s$ : in-plane bending (scissoring).<sup>2</sup>

148 As shown in Fig. S1, a strong band at about 1085 cm<sup>-1</sup> is almost unchanged before and after  
149 reaction, whilst the peak at 1255 cm<sup>-1</sup> and the peaks range from 725 cm<sup>-1</sup> to 910 cm<sup>-1</sup> (assigned to  
150 the epoxy groups) are decreased. The broad peak at 3428 cm<sup>-1</sup> (assigned to the N-H and O-H  
151 groups) is increased remarkably, which was the product were production of the  
152 ring-opening reaction. In addition, a N-H peak at 1630 cm<sup>-1</sup> is observed only on the spectra of the  
153 hybrid materials. All these results demonstrated the occurrence of the ring-opening reaction  
154 forcefully.

155

156

157

158

159

160

161

162

163

164

165

166

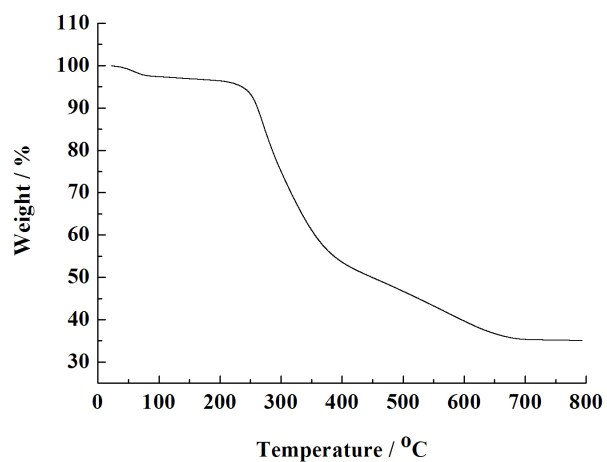

167

168 **Fig. S2** Thermal gravimetric analysis of the monolith POSS-HDA at a heating rate of 10 °C/min in  
169 air. The significant weight lost indicates the occurrence of the ring-opening polymerization.

170

171

172

173

174

175

176

177

178

179

180

181

182

183

184

185

186

187

188

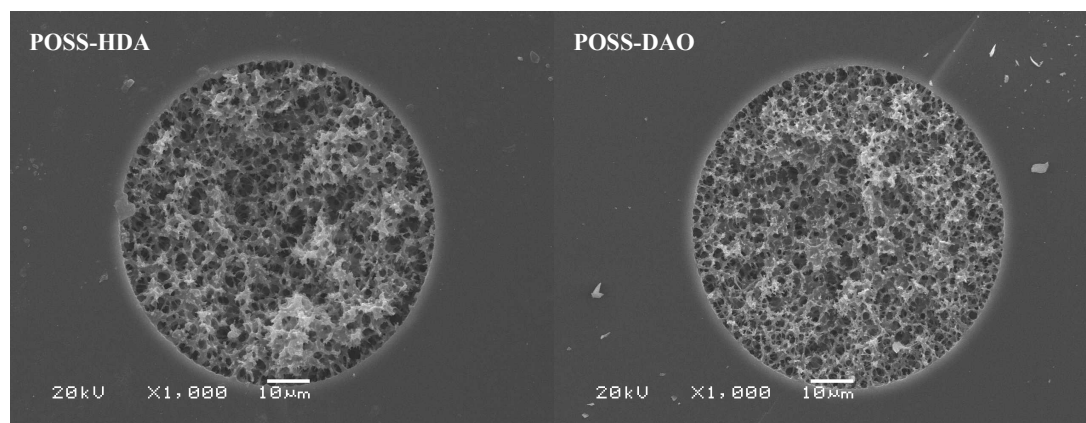

189

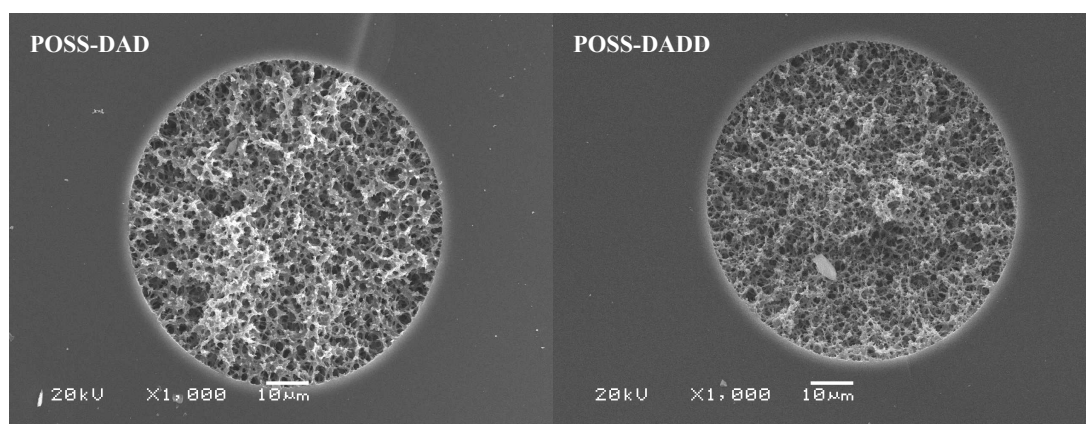

190

191 **Fig. S3** The cross-section of the monolithic columns prepared with different diamines.

192 Magnification: 1000×.

193 The monolithic matrices anchored to the inner wall of the capillaries tightly, and well-controlled

194 3D skeleton was all achieved on these four monolithic columns.

195

196

197

198

199

200

201

202

203

204



205

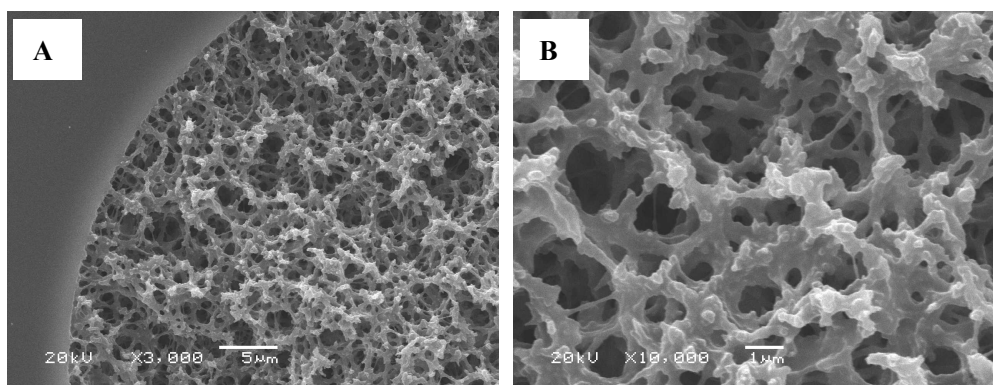

206

207 **Fig. S4** SEM images of the cross-section of the hybrid POSS-DADD monolithic column.

208 Magnification: (A) 3000× and (B) 10000×.

209

210

211

212

213

214

215

216

217

218

219

220

221

222

223

224

225

226

227

228

229

230

231

232

233

234

235

236

237

238

239

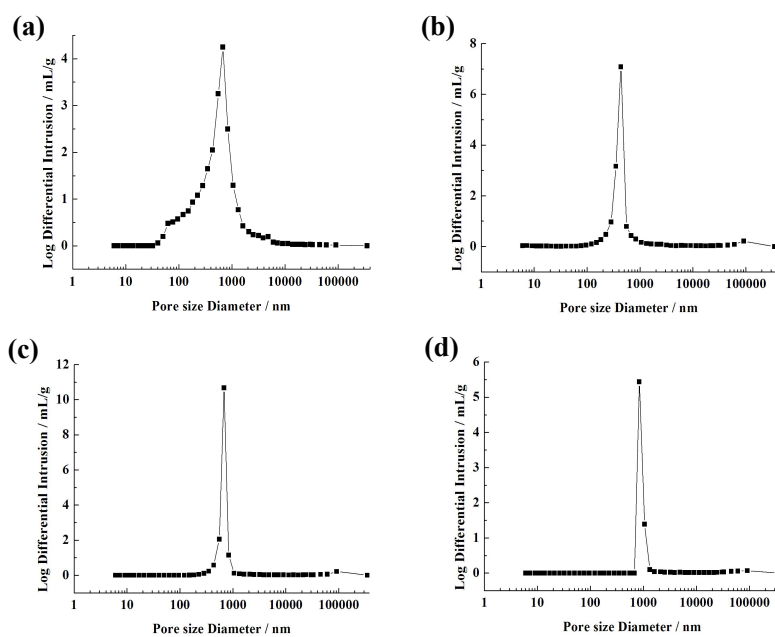

240 **Fig. S5** Pore size distribution of the monolith POSS-DADD (a) and other monoliths 1 (b), 4 (c)

241 and 5 (d) in Table S2 in the Supporting Information by the mercury intrusion method.

242

243

244

245

246

247

248

249

250

251

252

253

254

255

256

257

258

259

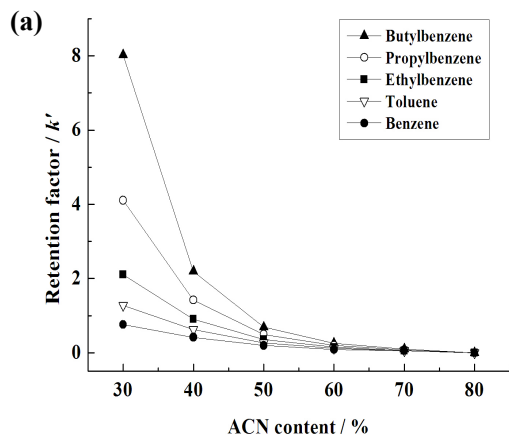

260

261

262

263

264

265

266

267

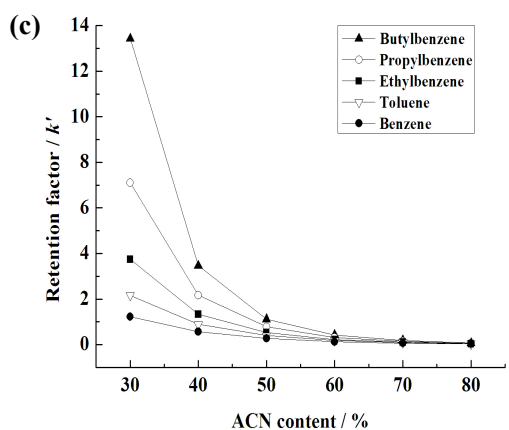

268

269

270

271

272

273

274

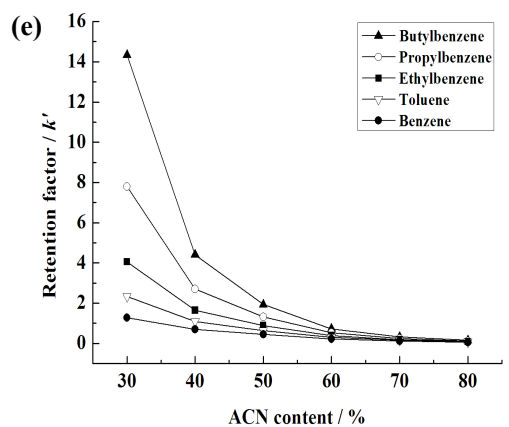

275

276

277

278

279

280

281

282

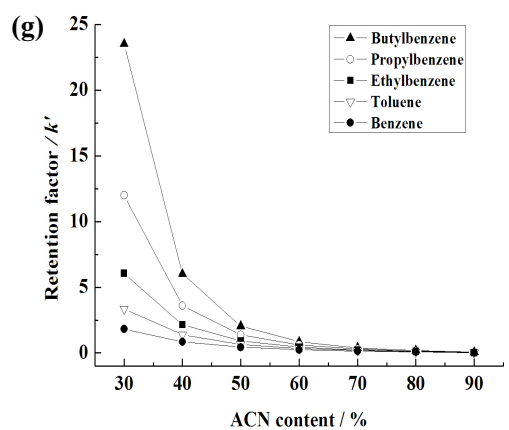

283

284

285

286

287

288

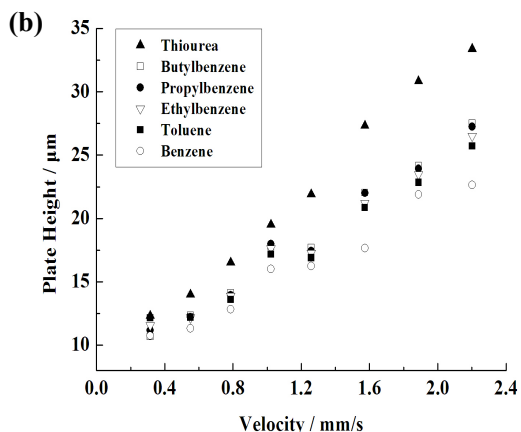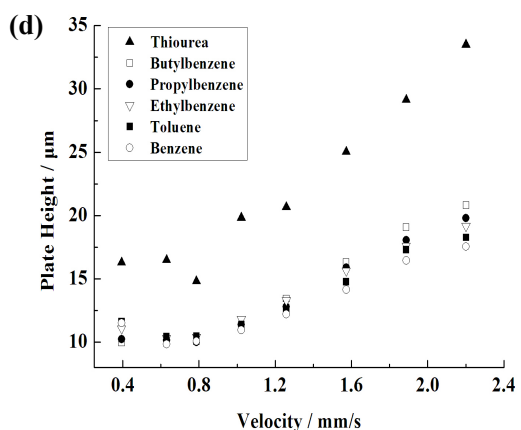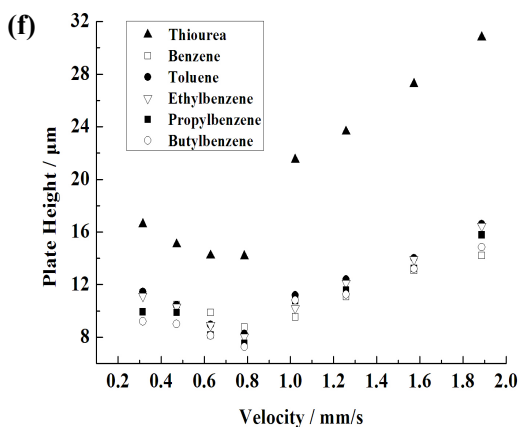

289 **Fig. S6** The influence of ACN concentration on the retention factors of alkylbenzenes (a, c, e, g)  
290 and the dependence of their plate heights on the linear velocity of the mobile phase (b, d, f) by the  
291 monoliths POSS-HDA (a, b), POSS-DAO (c, d), POSS-DAD (e, f) and POSS-DADD (g) in cLC.  
292 Experimental conditions: column dimension for (a, b), 41 cm × 75 μm i.d., for (c, d), 49 cm × 75  
293 μm i.d., for (e, f), 49 cm × 75 μm i.d., for (g), 48 cm × 75 μm i.d.; flow rate for (a, e), 50 μL/min  
294 (before split), for (c), 80 μL/min (before split), for (g), 100 μL/min (before split); mobile phase for  
295 (b, f), ACN/water (50/50, v/v), for (d), ACN/water (45/55, v/v); injection volume, 2.5 μL in split  
296 mode; detection wavelength, 214 nm.

297

298

299

300

301

302

303

304

305

306

307

308

309

310

311

312

313

314

315

316

317

318

319

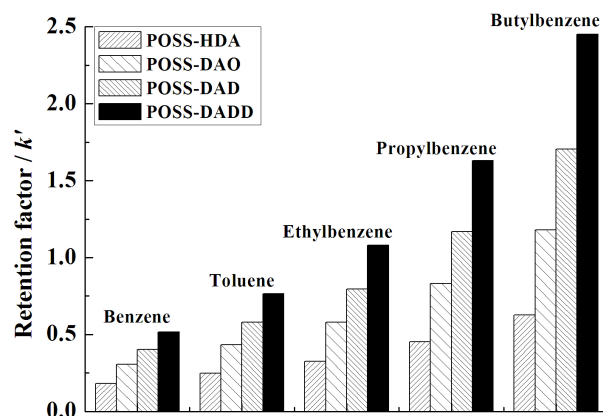

320

321 **Fig. S7** Comparison of the hydrophobicity of the hybrid monolithic columns prepared with  
322 different diamines. Experimental conditions: flow rate, 50  $\mu\text{L}/\text{min}$  (before split); mobile phase,  
323 ACN/water (50/50, v/v); injection volume, 2.5  $\mu\text{L}$  in split mode; detection wavelength, 214 nm.

324

325

326

327

328

329

330

331

332

333

334

335

336

337

338

339

340

341

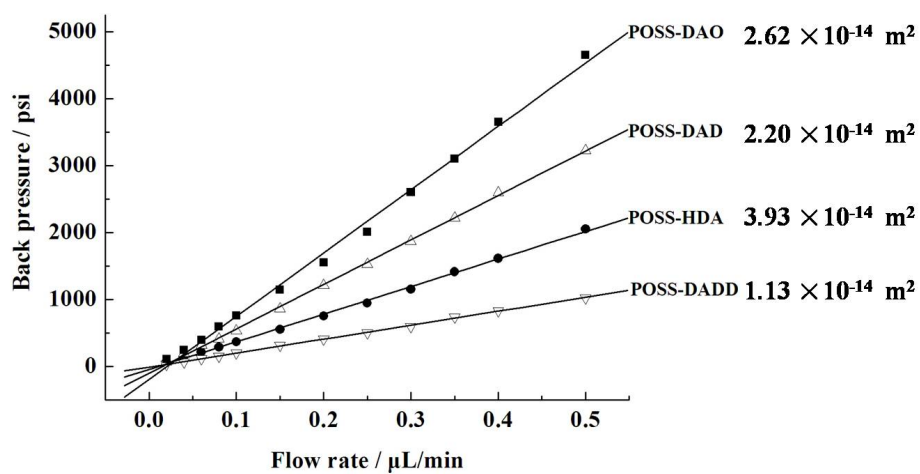

342

343 **Fig. S8** The relationships between flow rate and the back pressure drop of the monolithic columns.

344 Experimental condition: mobile phase, ACN/water (40/60, v/v).

345

346

347

348

349

350

351

352

353

354

355

356

357

358

359

360

361

362

363

364

365

366

367

368

369

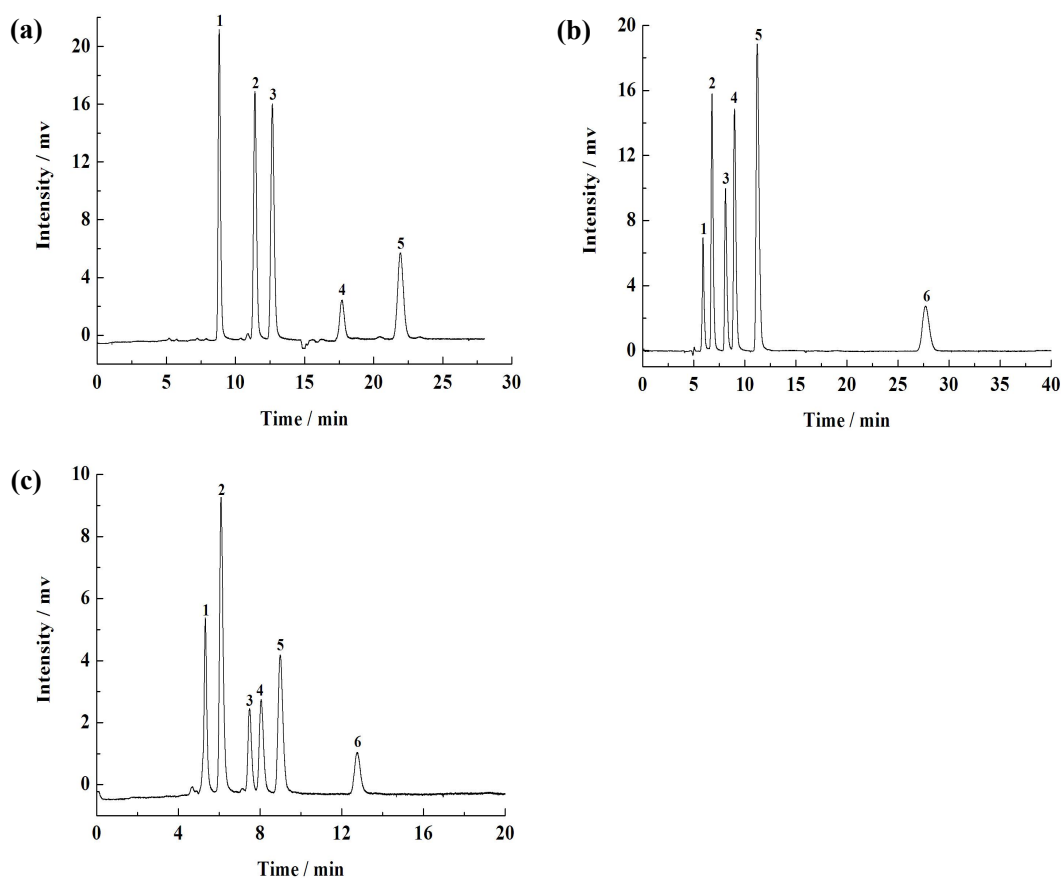

370

371

372

373

374

375

376

377 **Fig. S9** Separations of polycyclic aromatic hydrocarbons (PAHs) (a), phenols (b) and anilines (c)

378 on the POSS-DADD monolithic column in cLC. Analytes: (a), (1) naphthalene, (2) acenaphthene,

379 (3) 4,4'-dimethylbiphenyl, (4) p-terphenyl, (5) pyrene; (b), (1) hydroquinone, (2) resorcinol, (3)

380 pyrocatechol, (4) phenol, (5) 4-cresol, (6) 4-tert-butylphenol; (c), (1) 2,4-diaminotoluene, (2)

381 benzidine, (3) 2-nitroaniline, (4) 2,4-dinitroaniline, (5) 4-aminobiphenyl, (6)

382 2,6-dichloro-4-nitroaniline; Experimental conditions: column dimensions, 47 cm × 75 μm i.d.;

383 mobile phase for (a), ACN/water (60/40, v/v), for (b), ACN/water (35/65, v/v), for (c), ACN/water

384 (50/50, v/v); flow rate, 60 μL/min (before split); injection volume, 2.5 μL in split mode; detection

385 wavelength, 214 nm.

386

387

388

389

390

391

392

393

394

395

396

397

398

399

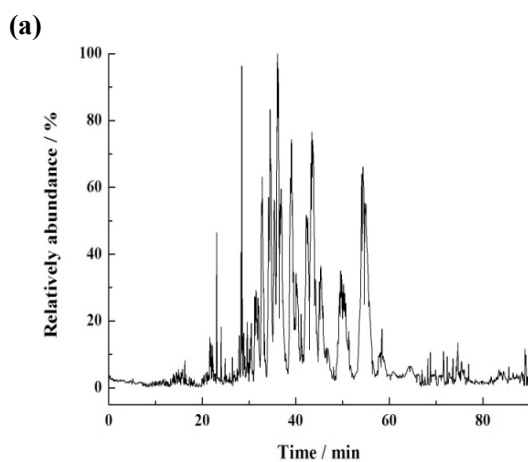

400

401

402

403

404

405

406

407

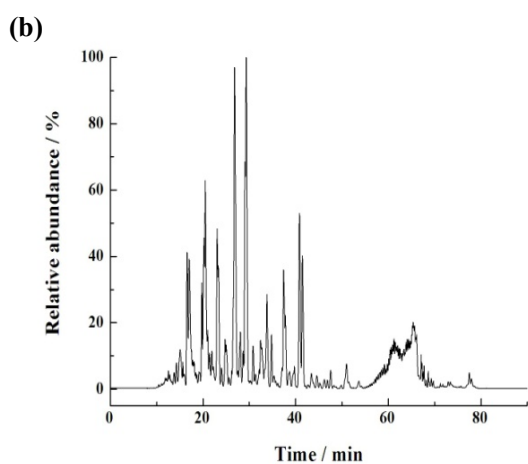

408 **Fig. S10** Base-peak chromatograms of cLC-MS/MS analysis of a BSA tryptic digest on monolith

409 POSS-DADD (a) and C18-particles packed column (b). Experimental conditions: column

410 dimensions for (a), 40 cm  $\times$  75  $\mu$ m i.d., for (b), 12 cm  $\times$  75  $\mu$ m i.d.; mobile phase: buffer A, 100%

411 water (containing 0.1% formic acid), buffer B, 100% ACN (containing 0.1% formic acid);

412 separation gradient, buffer B from 5% to 80% in 65 min, flow rate, 200 nL/min (after split).

413

414

415

416

417

418

419

420

421



422

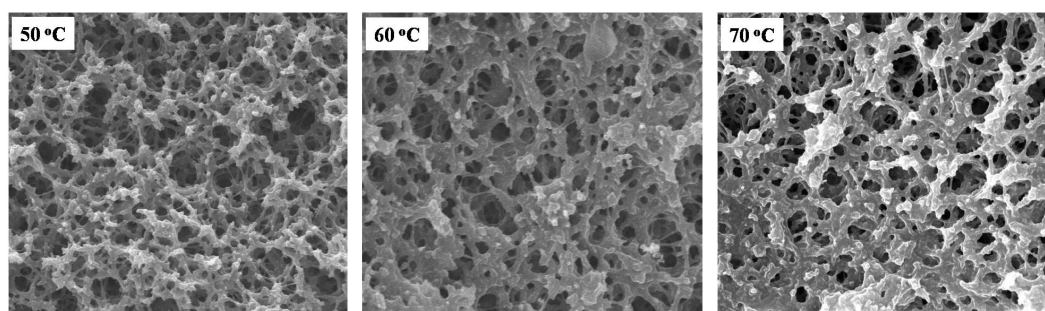

423

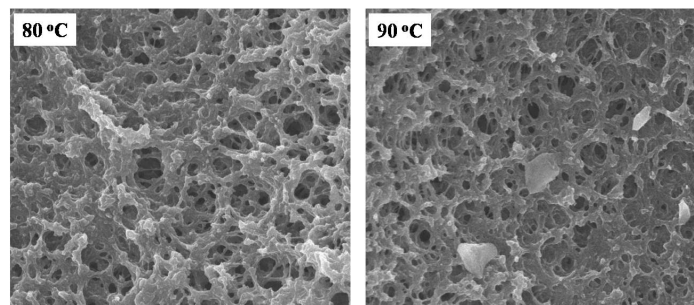

424

425 **Fig. S11** The SEM images of the monolith POSS-DADD prepared at different temperatures.

426 Magnification: 3000×.

427 By comparing the monoliths prepared at different temperatures, it could be found that the pore  
428 size decreased as the polymerization temperatures increased.

429

430

431

432

433

434

435

436

437

438

439

440

441

442

443

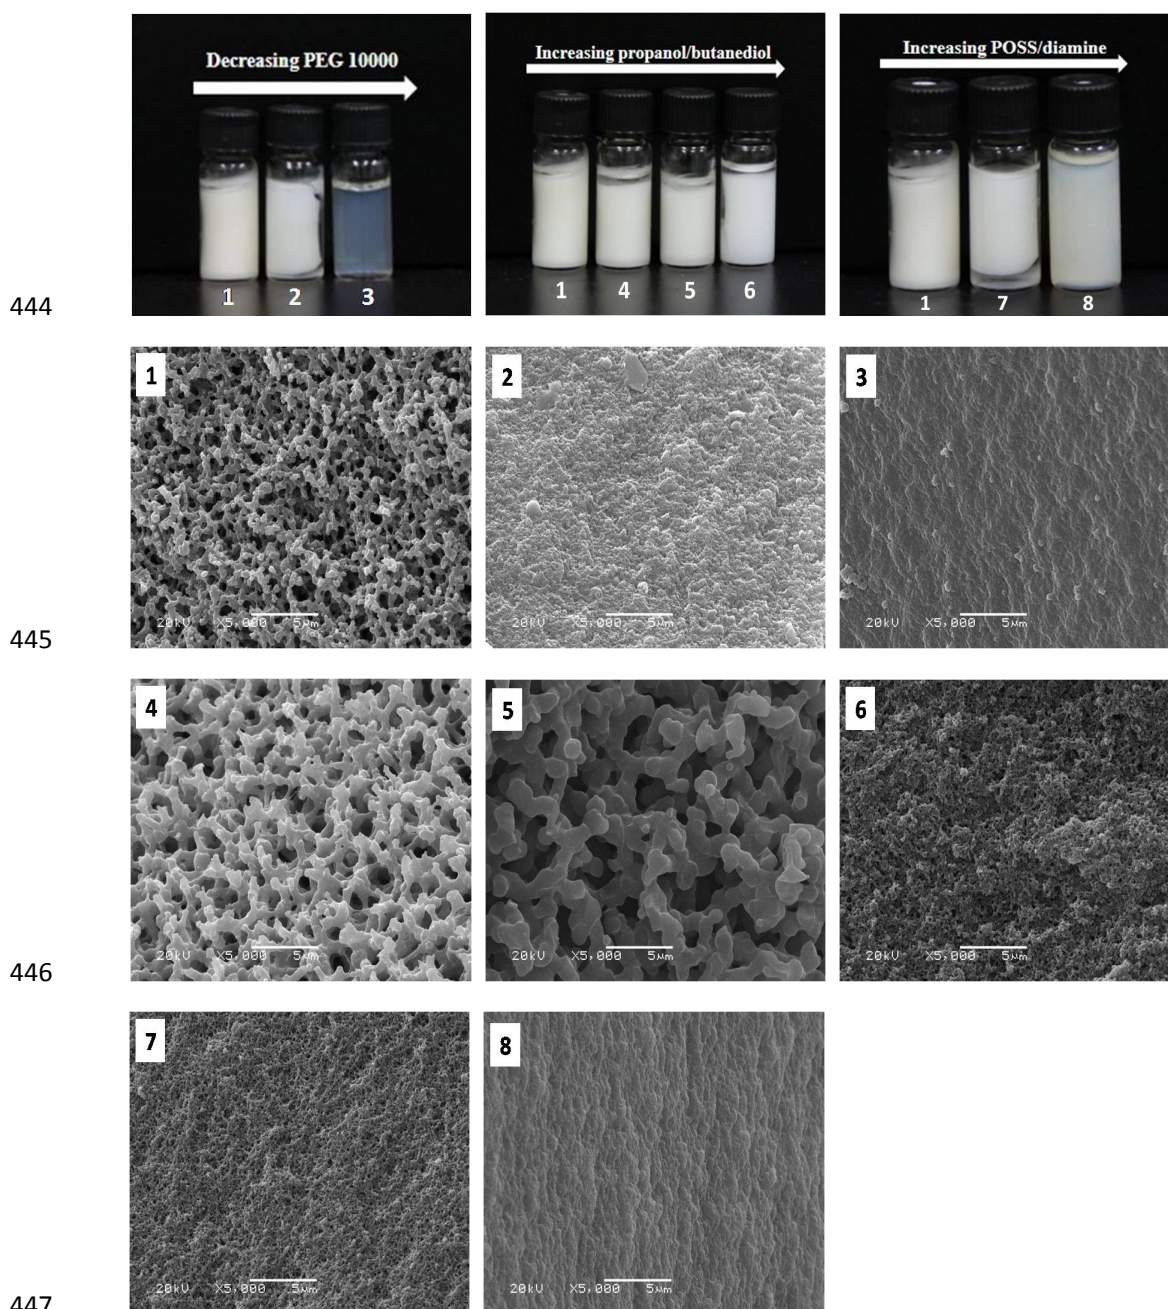

448 **Fig. S12** The bulk hybrid materials prepared with different feed recipes and their SEM images.

449 Magnification: 5000×.

450 As shown above, the pore size of the hybrid monoliths decreased with either a decrease of the  
451 fraction of PEG 10,000 or an increase of the fraction of propanol. It is promising that hybrid  
452 materials with different high surface areas and high ordered 3D skeleton could be achieved  
453 conveniently by slightly adjusting the component of the porogenic solvents (see Table S2 for the  
454 detail preparation information).

455

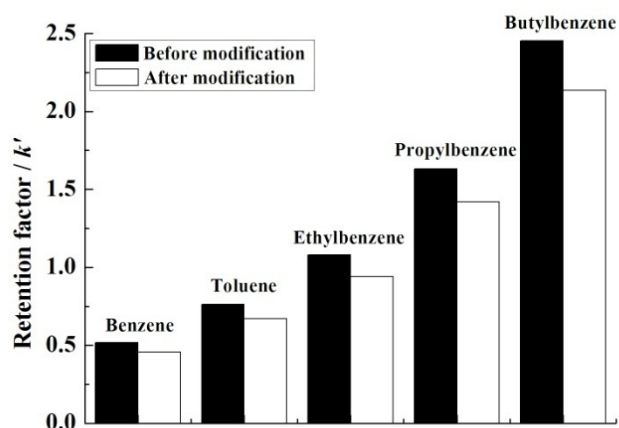

456

457 **Fig. S13** The retention factors of alkylbenzenes on the monolith POSS-DADD before and after  
458  $\text{NH}_3 \cdot \text{H}_2\text{O}$  modification. Experimental conditions: column dimension, 38 cm  $\times$  75  $\mu\text{m}$  i.d.; flow  
459 rate, 50  $\mu\text{L}/\text{min}$  (before split); mobile phase, ACN/water (50/50, v/v); injection volume, 2.5  $\mu\text{L}$  in  
460 split mode; detection wavelength, 214 nm.

461 The decrease in retention indicated the existence of the residual epoxy groups, and demonstrated  
462 the good tailorability of the prepared hybrid materials.

463

464

465

466

467

468

469

470

471

472

473

474

475

476

477 **Supplementary Tables**

478

479 **Table S1.** Comparison of the performance of the monolithic column and C18-particles packed

480 column in cLC-MS/MS.

| Column                             | Unique peptides | Sequence coverage / % |
|------------------------------------|-----------------|-----------------------|
| <b>POSS-DADD monolith</b>          | <b>51</b>       | <b>57.0</b>           |
| <b>C18-particles packed column</b> | <b>44</b>       | <b>59.3</b>           |

481

482

483

484

485

486

487

488

489

490

491

492

493

494

495

496

497

498

499

500

501

502

503

504 **Table S2.** Components of the prepolymerization solution of the bulk hybrid materials.

| <b>Monolith</b> | <b>POSS<br/>(mg)</b> | <b>HDA<br/>(mg)</b> | <b>Propanol<br/>(<math>\mu</math>L)</b> | <b>1,4-Butanediol<br/>(<math>\mu</math>L)</b> | <b>PEG10,000<br/>(mg)</b> | <b>Temp<br/>(<math>^{\circ}</math>C)</b> | <b>BET Surface<br/>area (<math>m^2/g</math>)</b> | <b>Total pore<br/>volume (mL/g)</b> | <b>Average pore<br/>size (nm)</b> |
|-----------------|----------------------|---------------------|-----------------------------------------|-----------------------------------------------|---------------------------|------------------------------------------|--------------------------------------------------|-------------------------------------|-----------------------------------|
| <b>1</b>        | <b>50</b>            | <b>15</b>           | <b>280</b>                              | <b>40</b>                                     | <b>30</b>                 | <b>70</b>                                | <b>11.46</b>                                     | <b>1.63</b>                         | <b>336</b>                        |
| <b>2</b>        | <b>50</b>            | <b>15</b>           | <b>280</b>                              | <b>40</b>                                     | <b>15</b>                 | <b>70</b>                                | <b>0.57</b>                                      | <b>/</b>                            | <b>/</b>                          |
| <b>3</b>        | <b>50</b>            | <b>15</b>           | <b>280</b>                              | <b>40</b>                                     | <b>0</b>                  | <b>70</b>                                | <b>0.47</b>                                      | <b>/</b>                            | <b>/</b>                          |
| <b>4</b>        | <b>50</b>            | <b>15</b>           | <b>280</b>                              | <b>80</b>                                     | <b>30</b>                 | <b>70</b>                                | <b>6.78</b>                                      | <b>1.57</b>                         | <b>802</b>                        |
| <b>5</b>        | <b>50</b>            | <b>15</b>           | <b>280</b>                              | <b>0</b>                                      | <b>30</b>                 | <b>70</b>                                | <b>3.75</b>                                      | <b>0.79</b>                         | <b>1109</b>                       |
| <b>6</b>        | <b>50</b>            | <b>15</b>           | <b>560</b>                              | <b>0</b>                                      | <b>30</b>                 | <b>70</b>                                | <b>46.53</b>                                     | <b>0.64</b>                         | <b>64</b>                         |
| <b>7</b>        | <b>50</b>            | <b>5</b>            | <b>280</b>                              | <b>40</b>                                     | <b>30</b>                 | <b>70</b>                                | <b>79.09</b>                                     | <b>0.25</b>                         | <b>47</b>                         |
| <b>8</b>        | <b>100</b>           | <b>5</b>            | <b>280</b>                              | <b>40</b>                                     | <b>30</b>                 | <b>70</b>                                | <b>43.82</b>                                     | <b>0.07</b>                         | <b>94</b>                         |

505

506

507

508

509

510

511

512

513

514

515

516

517

518

519

520

521

522
